# Supplementary material
Source: publisher site journal article supplement (https://www.dovepress.com/article/595659)
Supplement: Supplementary file 1 [file 595659_Supplementary.docx]

Table S1. Hyperparameters searching field

| Parameter Name | Search Type | Search Space |
| --- | --- | --- |
| eta | Uniform | (0.01, 0.1) |
| max_depth | Sparse | (3, 5) |
| min_child_weight | Sparse | (1, 10) |
| subsample | Uniform | (0.7, 1.0) |
| lambda | Log Uniform | (1e-9, 1.0) |
| alpha | Log Uniform | (1e-9, 1.0) |
| colsample_bytree | Uniform | (0.7, 1.0) |
| objective | Fixed | binary:logistic |
| eval_metric | Fixed | auc |

Table S2. Final Model Hyperparameters

| Parameter Name | Fold 1 | Fold 2 | Fold 3 | Fold 4 | Fold 5 |
| --- | --- | --- | --- | --- | --- |
| eta | 0.09357441527726162 | 0.05960984050940798 | 0.09782821041645746 | 0.08729856352202811 | 0.06514955305084151 |
| max_depth | 10 | 8 | 5 | 7 | 6 |
| min_child_weight | 1 | 1 | 2 | 1 | 1 |
| subsample | 0.7310170437783555 | 0.7117640153701819 | 0.7442084452321656 | 0.8967005971356149 | 0.7070455241944975 |
| lambda | 0.006809719076700407 | 0.2670402594416103 | 1.8751159291679794e-07 | 7.106493849518605e-07 | 0.04275828641255821 |
| alpha | 1.7340358505762683e-06 | 0.9141511550549181 | 2.2627180766283382e-06 | 0.008449531805250227 | 2.440081649783888e-07 |
| colsample_bytree | 0.9785149267891738 | 0.7019203543456067 | 0.9013666607135844 | 0.7284284212447405 | 0.819237062697679 |
| objective | binary: logistic | | | | |
| eval_metric | auc | | | | |
| boost_rounds | 86 | 217 | 116 | 82 | 176 |
